# Supplementary material
Source: MDPI journal article supplement (https://www.mdpi.com/2071-1050/14/18/11440)
Supplement: s1 [file s1]

# Supplementary Material For Bacterial community composition in soil

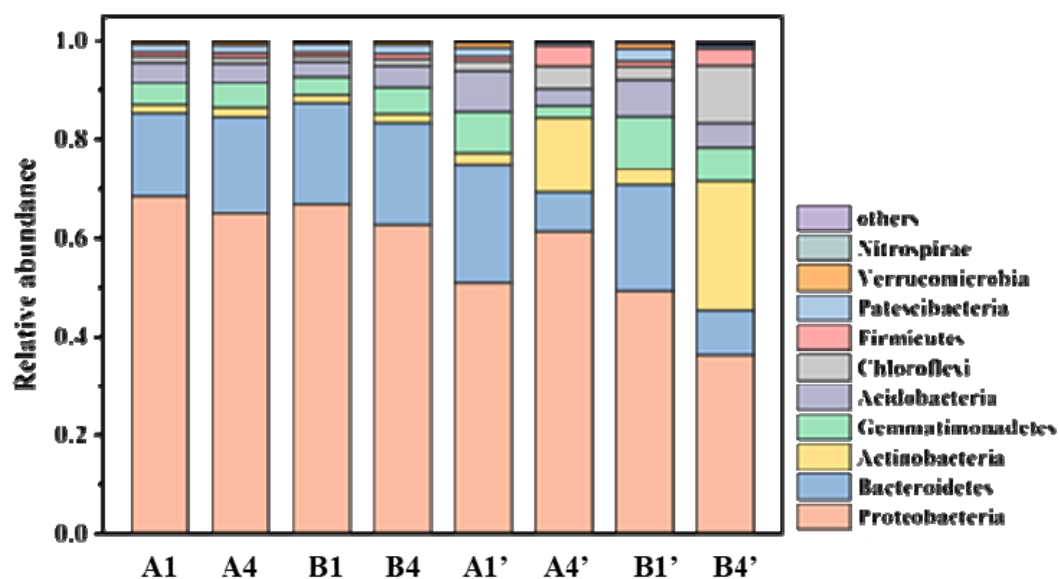

**Figure S1.** The main microorganisms distribution in soil of phylum level before and after the experiment (A1: Before remediation; A1' : After remediation).

The main bacterial phylum with the abundance ranked the top 10 in soil before and after EK-PRB remediation is shown in Figure.S1. After EK-PRB remediation, the relative abundance of Burkholderiaceae in the soil of line B was higher than line A. The relative abundance of Burkholderiaceae at B4 is the highest which is 5.14%.
